# Supplementary material for: Drought and exogenous abscisic acid alter hydrogen peroxide accumulation and differentially regulate the expression of two maize RD22-like genes
Source: PubMed Central journal article supplement (PMC5562893; doi:10.1038/s41598-017-08976-x), 2017-08-18
Supplement: 41598_2017_8976_MOESM1_ESM.pdf [file 41598_2017_8976_MOESM1_ESM.pdf]

**Title:** Drought and exogenous abscisic acid alter hydrogen peroxide accumulation and differentially regulate the expression of two maize RD22-like genes

**Authors:** Kyle Phillips<sup>1</sup> & Ndiko Ludidi<sup>1,2\*</sup>

**Affiliations:** <sup>1</sup>Plant Biotechnology Research Group  
Department of Biotechnology  
Life Sciences Building  
University of the Western Cape  
Robert Sobukwe Road  
Bellville, 7530  
South Africa

<sup>2</sup>DST-NRF Centre of Excellence in Food Security  
University of the Western Cape  
Robert Sobukwe Road  
Bellville, 7530  
South Africa

**\*Corresponding Author:** [nludidi@uwc.ac.za](mailto:nludidi@uwc.ac.za)

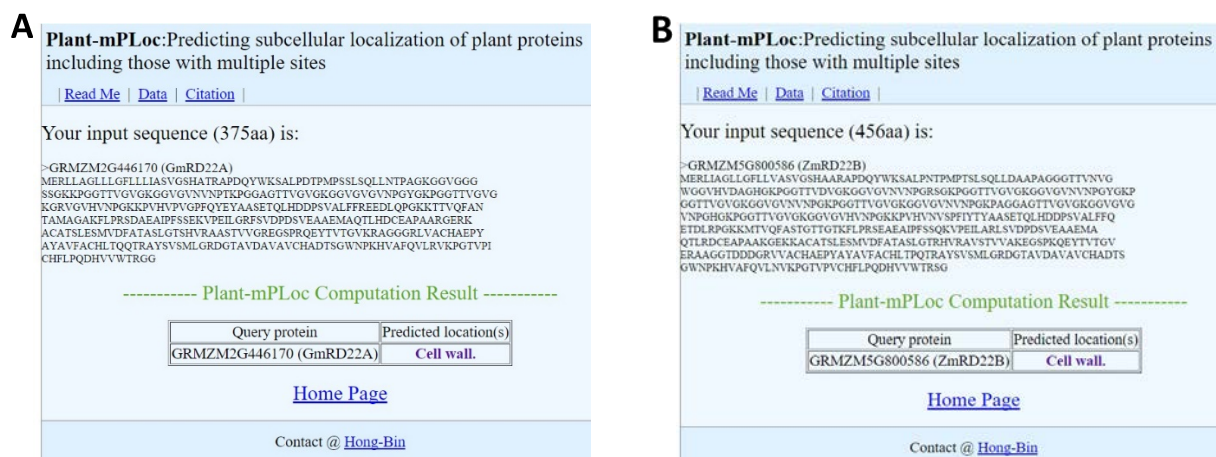

**Figure S1: Prediction of the subcellular localization of maize RD22 proteins. (a)** Subcellular localization of ZmRD22A based on Plant-mPLOC prediction. **(b)** Subcellular localization of ZmRD22B based on Plant-mPLOC prediction.

**Supplementary Table S1: Primer sequences used in semi-quantitative and quantitative PCR analysis.**

| Gene name           | Forward primer                                  | Reverse primer                                |
|---------------------|-------------------------------------------------|-----------------------------------------------|
| ZmRD22A             | 5'-GCG GGC GGG CGG CGG GCG CCT G-3'             | 5'-TCA GCCGCC GCG GGT CCAGAC GAC G-3'         |
| ZmRD22B             | 5'- CGA CGA CGA CGG CCG GGT CGT G -3'           | 5'- TCA GCC GCT GCG GGT CCA GAC GAC GTG -3'   |
| Zm18s rRNA          | 5'-CCA TCC CTC CGT AGT TAG CTT CT -3'           | 5'-CCT GTC GGC CAA GGC TAT ATA C-3'           |
| Zm $\beta$ -tubulin | 5'- AGC CCG ATG GCA CCA TGC CCA GTG ATA CCT -3' | 5'- AAC ACC AAG AAT CCC TGC AGC CCA GTG C -3' |
| Zm Actin            | 5'- GTG ACA ATG GCA CTG GAA TG -3'              | 5'- GAC CTG ACC ATC AGG CAT CT -3'            |
